# Supplementary material for: Sisymbrium Officinale (the Singers’ Plant) as an Ingredient: Analysis of Somatosensory Active Volatile Isothiocyanates in Model Food and Drinks
Source: MDPI journal article supplement (doi:10.3390/foods10020308), 2021-02-03
Supplement: s1 [file s1]

SUPPLEMENTARY MATERIAL

**Figure S1.** Calibration curves for ITCs. **(a)** concentration range: 0.25-1 ppm; **(b)** concentration range: 5-40 ppm.

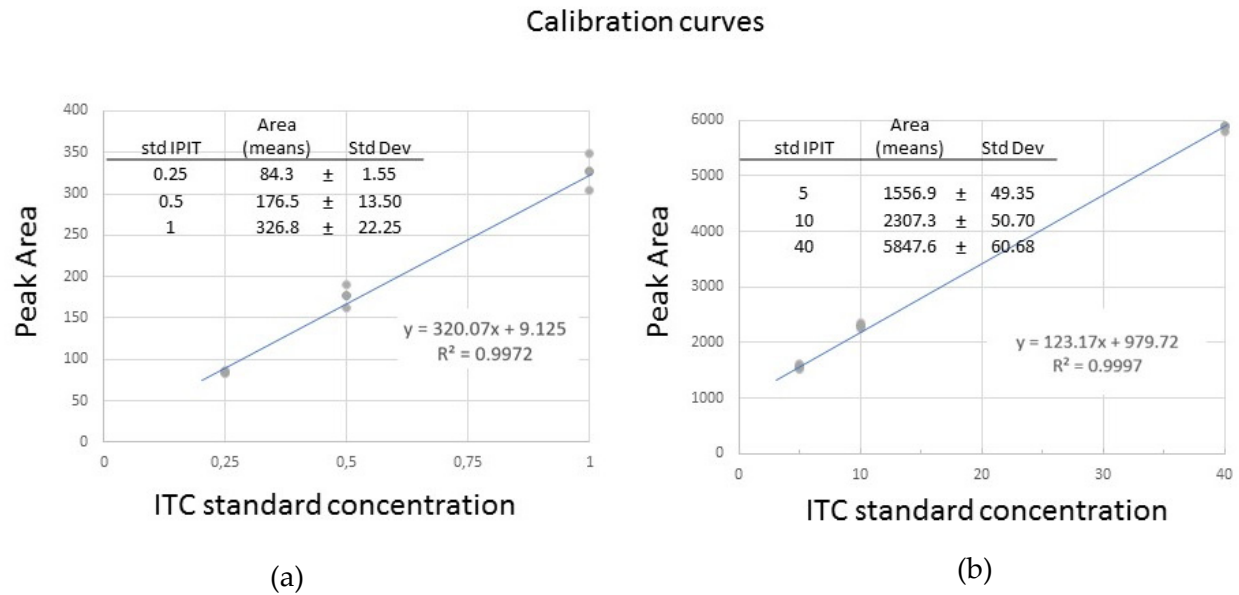

Figure S2: operative conditions for GCMS

|                                    |                          |
|------------------------------------|--------------------------|
| Oven                               |                          |
| Equilibration Time                 | 0.25 min                 |
| Oven Program                       | On                       |
| 40 °C for 2 min                    |                          |
| then 15 °C/min to 90 °C for 0 min  |                          |
| then 15 °C/min to 170 °C for 0 min |                          |
| then 15 °C/min to 240 °C for 4 min |                          |
| Run Time                           | 19.333 min               |
|                                    |                          |
| No Injectors                       |                          |
|                                    |                          |
| Front SS Inlet He                  |                          |
| Mode                               | Split                    |
| Heater                             | On 200 °C                |
| Pressure                           | On 7.7626 psi            |
| Total Flow                         | On 9 mL/min              |
| Septum Purge Flow                  | On 3 mL/min              |
| Gas Saver                          | On 15 mL/min After 6 min |
| Split Ratio                        | 5 :1                     |
| Split Flow                         | 5 mL/min                 |
|                                    |                          |
| Thermal Aux 2 {MSD Transfer Line}  |                          |
| Heater                             | off                      |
| Temperature Program                | off                      |
| 230 °C for 0 min                   |                          |
| Run Time                           | 19.333 min               |
| Column #1                          |                          |
| DB-5: 1479.69599                   |                          |
| DB-5                               |                          |
| 325 °C: 30 m x 250 µm x 0.25 µm    |                          |
| In: Front SS Inlet He              |                          |
| Out: Vacuum                        |                          |
| (Initial)                          | 40 °C                    |
| Pressure                           | 7.7626 psi               |
| Flow                               | 1 mL/min                 |
| Average Velocity                   | 35.143 cm/sec            |
| Holdup Time                        | 1.4227 min               |
| Flow Program                       | On                       |
| 1 mL/min for 0 min                 |                          |
| Run Time                           | 19.333 min               |

Figura

Figura 2.5: Condizioni gascromatografiche impiegate

|                      |                             |
|----------------------|-----------------------------|
| Solvent Delay        | : 0.50 min                  |
| EMV Mode             | : Relative                  |
| Relative Voltage     | : 0                         |
| Resulting EM Voltage | : 1812                      |
| [Scan Parameters]    |                             |
| Low Mass             | : 40.0                      |
| High Mass            | : 300.0                     |
| Threshold            | : 150                       |
| Sample #             | : 2      A/D Samples      4 |
| [MSZones]            |                             |
| MS Source            | : 250 C      maximum 250 C  |
| MS Quad              | : 150 C      maximum 200 C  |

Figura 2.6: Parametri di acquisizione ms

Figure S3: Operative conditions for autosampling

CYCLE DETAILS  
-----  
Pre Incubation Time (s): 60  
Incubation Temp. (°C): 80  
Pre Inc Agitator Speed (rpm): 250  
Agitator On Time (s): 10  
Agitator Off Time (s): 10  
Vial Penetration in mm (μl): 22  
Extraction Time (s): 300  
Desorb to: GC Inj1  
Injection Penetration in mm (μl): 54  
Desorption Time (s): 150  
GC Runtime (s): 300

Figura 2.7: Impostazioni di microestrazione utilizzate per i campioni infusi

CYCLE DETAILS  
-----  
Pre Incubation Time (s): 60  
Incubation Temp. (°C): 37  
Pre Inc Agitator Speed (rpm): 250  
Agitator On Time (s): 10  
Agitator Off Time (s): 10  
Vial Penetration in mm (μl): 22  
Extraction Time (s): 600  
Desorb to: GC Inj1  
Injection Penetration in mm (μl): 54  
Desorption Time (s): 180  
GC Runtime (s): 300

Figura 2.8: Impostazioni di microestrazione utilizzate per i campioni non infusi

Figure S4: Spectrum of IPITC

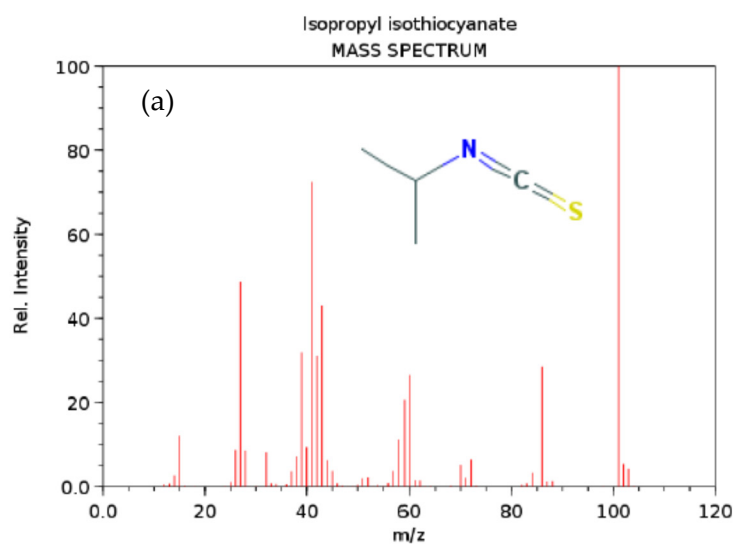

Figura 3.6: Spettro di massa di Isopropil-Isotiocianato

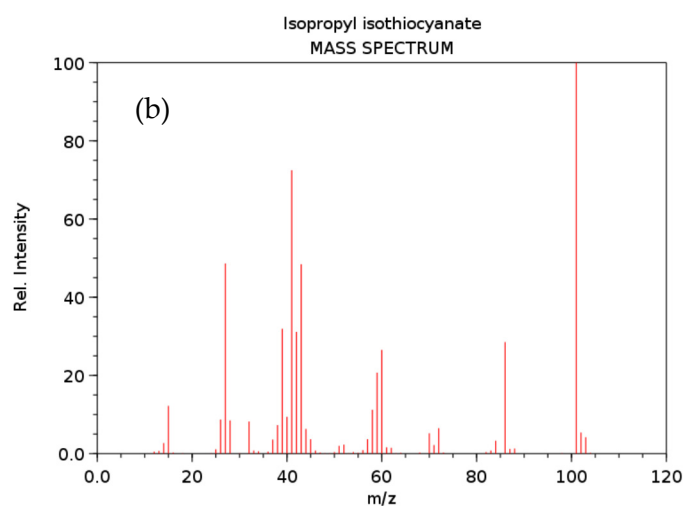

NIST Chemistry WebBook (<https://webbook.nist.gov/chemistry>)

Comparison, Mass spectrum of iPITC (a) from NIST (b)

Figure S5: Identification (a) and spectra (b) of unknown peaks

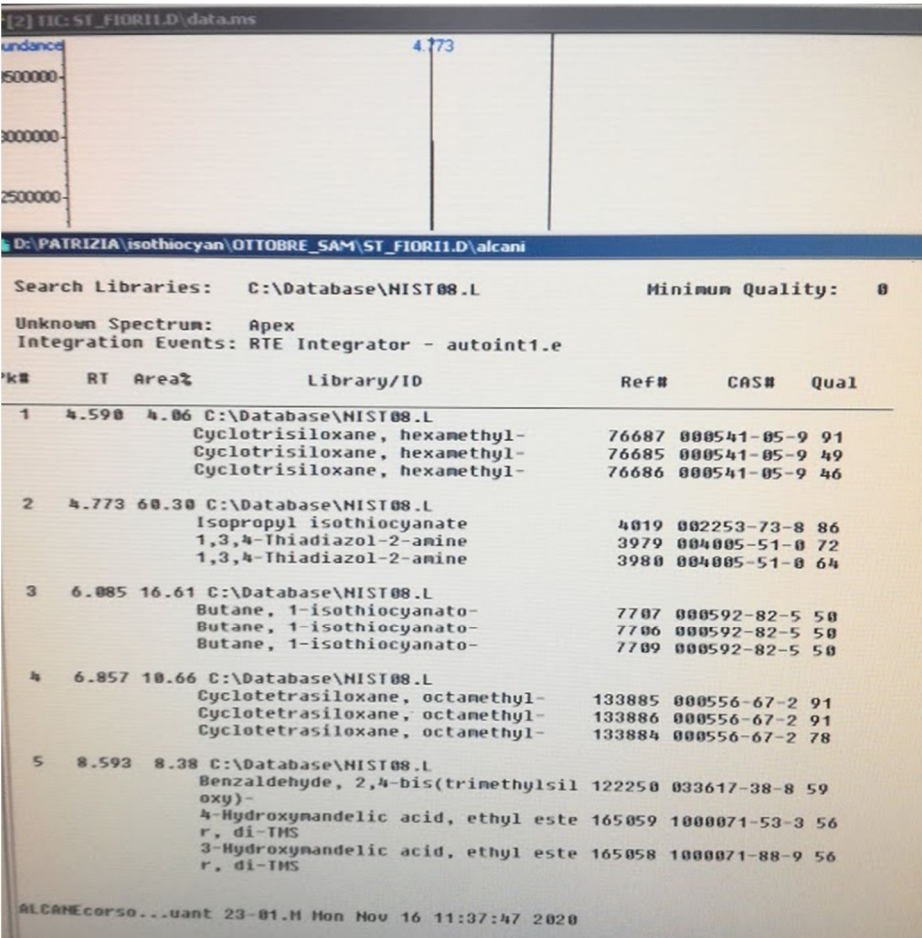

(a)

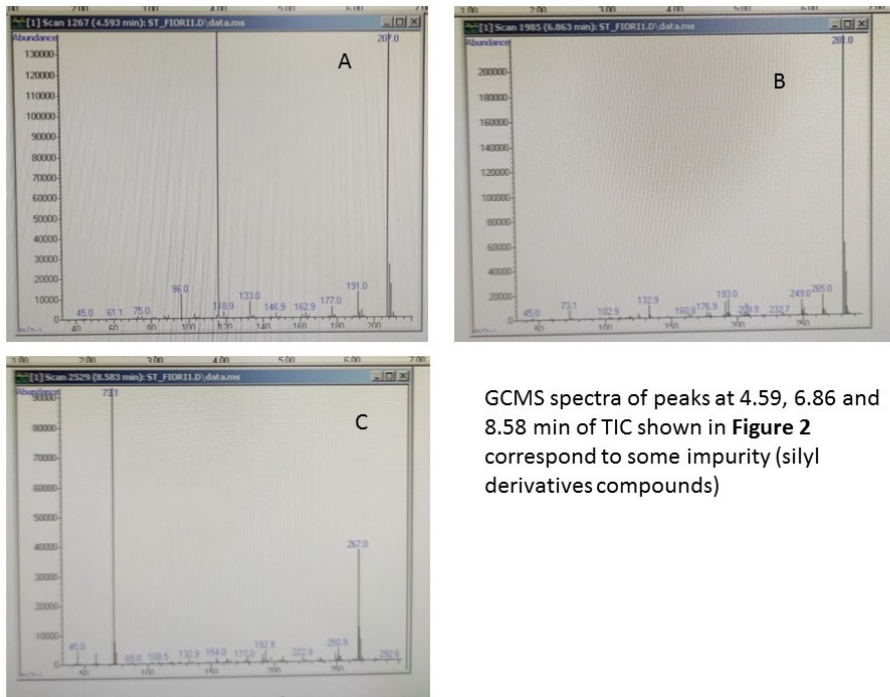

GCMS spectra of peaks at 4.59, 6.86 and 8.58 min of TIC shown in Figure 2 correspond to some impurity (silyl derivatives compounds)

Table S1: additional data to Table 1

| sample | Total ITCs (µg/g) |
|--------|-------------------|
| S1/1   | 0.002 ± 0.00018   |
| S1/2   | 0.804 ± 0.07      |
| S1/3   | 0.126 ± 0.01      |
| S1/4   | 0.140 ± 0.09      |
| S1/5   | 0.150 ± 0.01      |

Data are the means of 3 replicates ± SD
